1

# Decoding the Neural Signatures of Valence and Arousal From Portable EEG Headset

Nikhil Garg<sup>1,2,3</sup>, Rohit Garg<sup>4,\*</sup>, Apoorv Anand<sup>6</sup> and Veeky Baths<sup>5,6</sup>

<sup>1</sup>*Institut Interdisciplinaire d'Innovation Technologique (3IT), Université de Sherbrooke, Sherbrooke, Québec J1K 0A5, Canada*

<sup>2</sup>*Laboratoire Nanotechnologies Nanosystèmes (LN2) – CNRS UMI-3463, Université de Sherbrooke, Sherbrooke, Québec J1K 0A5, Canada*

<sup>3</sup>*Institute of Electronics, Microelectronics and Nanotechnology (IEMN), Université de Lille, 59650 Villeneuve d'Ascq, France*

<sup>4</sup>*Department of Computer Science and Information Systems, BITS Pilani K K Birla Goa Campus, Goa, India*

<sup>5</sup>*Cognitive Neuroscience Lab, BITS Pilani K K Birla Goa Campus, Goa, India*

<sup>6</sup>*Department of Biological Sciences, BITS Pilani K K Birla Goa Campus, Goa, India*

Correspondence\*:

Corresponding Author

f20180193@goa.bits-pilani.ac.in

## 2 ABSTRACT

Emotion classification using electroencephalography (EEG) data and machine learning techniques has been on the rise in the recent past. However, past studies use data from medical-grade EEG setup with long set-up time and environment constraints. This paper focuses on classifying emotions on the valence-arousal plane using various feature extraction, feature selection and machine learning techniques. We evaluate different feature extraction and selection techniques and propose the optimal set of features and electrodes for emotion recognition. The images from the OASIS image dataset were used to elicit valence and arousal emotions, and the EEG data was recorded using the Emotiv Epoc X mobile EEG headset. The analysis is carried out on publicly available datasets: DEAP and DREAMER for benchmarking. We propose a novel feature ranking technique and incremental learning approach to analyze performance dependence on the number of participants. Leave-one-subject-out cross-validation was carried out to identify subject bias in emotion elicitation patterns. The importance of different electrode locations was calculated, which could be used for designing a headset for emotion recognition. The collected dataset and pipeline are also published. Our study achieved a root mean square score (RMSE) of 0.905 on DREAMER, 1.902 on DEAP, and 2.728 on our dataset for valence label and a score of 0.749 on DREAMER, 1.769 on DEAP and 2.3 on our proposed dataset for arousal label respectively.

**Keywords:** Signal Processing, Electroencephalography, Machine Learning, Regression, Portable EEG, Valence, Arousal, Emotion, Feature extraction, artifact rejection

# 1 INTRODUCTION

The role of human emotion in cognition is vital and has been studied for a long time, with different experimental and behavioural paradigms. Psychology researchers have tried to understand human perception through surveys for a long time. Recently, with the increasing need to learn about human perception, without human biases and conception of various emotions across people (Ekman, 1972), we observe the increasing popularity of neurophysiological recordings and brain imaging methods. Since emotions are triggered almost instantly, Electroencephalography (EEG) is an attractive choice due to its better temporal resolutions and mobile recording devices. (Tuncer et al., 2021; Lang, 1995; Katsigiannis and Ramzan, 2018; Koelstra et al., 2012; Ko et al., 2021; Moss et al., 2003).

However, most pattern recognition benchmarks for decoding human emotions from EEG signals have been performed with research-grade EEG recording systems with large setup times, sophisticated recording setup, and cost. Although a portable EEG headset has a lesser signal-to-noise ratio, its low-cost and easy use makes it an attractive choice for collecting data from a wider population sample and overcoming the problem of insufficient uniform EEG data for algorithmic research. The algorithmic pipeline of decoding user intentions through neurophysiological signals consists of denoising, pre-processing, feature extraction, electrode and feature selection, and classification. Although there are deep-learning algorithms (Haselsteiner and Pfurtscheller, 2000; Jeevan et al., 2019; Karlekar et al., 2018; Mahajan and Baths, 2021; Schirrmeister et al., 2017; Übeyli, 2009; Zhou et al., 2018; Jin and Kim, 2020; Tao et al., 2020) which claim to do the frequency decomposition, feature extraction, and classifier training in the hidden layers, their explainability is limited, and amount of training data required is huge. Machine learning-based emotion recognition hence performs weighted Spatio-temporal averaging of EEG signals. While several feature extraction methods were reported in the past, it is crucial to understand which methods are suited for emotion recognition and optimize the set of features for performance. Moreover, the electrodes' relative importance can help explain the significance of different regions for emotion elicitation. This could, in turn, help in optimizing the electrode locations while conducting EEG-based studies.

In this study, first, we propose a protocol for eliciting emotions by presenting selected images from the OASIS dataset (Kurdi et al., 2016) and signal recording through a low-cost, portable EEG headset. Second, we create a pipeline of pre-preprocessing, feature extraction, electrode and feature selection, classifier for emotional response (Valence and Arousal) decoding and evaluate it for our dataset and two open-source datasets; incremental training to demonstrate the dependence of performance on population sample size is presented. Third, we rank different categories of feature extraction techniques to evaluate the applicability of feature extraction techniques for highlighting the patterns indicative of emotional response. Moreover, we analyze the electrode importance and rank different brain regions for their importance. Fourth, we ask if we can automate the feature selection and electrode selection techniques for BCI pipeline engineering and validate the procedure with a qualitative and quantitative comparison with neuroscience literature. Lastly, we publish the proposed pipeline and recorded dataset for community.

In the past, the scope of using electrophysiological data for emotion prediction has widened and led to standardized 2D emotion metrics of valence and arousal (Russell, 1980) to train and evaluate pattern recognition algorithms. Human brain-recording experiments have been conducted as part of effort to associate emotion quantitatively with words, pictures, sounds, and videos (Moors et al., 2013; Mohammad, 2018; Leite et al., 2012; Lane et al., 1999; Gerber et al., 2008; Warriner et al., 2013; Eerola and Vuoskoski, 2011; Lang, 1995; Kurdi et al., 2016). EEG frequency band has been found to be dominant during different roles, corresponding to various emotional and cognitive states (Klimesch, 2012, 1999; Klimesch et al.,

1990; Klimesch, 1996; Kamiński et al., 2012; Bauer et al., 2007; Berens et al., 2008; Jia and Kohn, 2011). Besides using energy spectral values, researchers use many other features such as frontal asymmetry, differential entropy and indexes for attention, approach motivation and memory. “Approach” emotions such as happiness are associated with left hemisphere brain activity, whereas “withdrawal,” such as disgust, emotions are associated with right hemisphere brain activity (Coan et al., 2001; Davidson et al., 1990). The left to right alpha activity is therefore used for approach motivation. The occipito-parietal alpha power has been found to have correlations with attention (Misselhorn et al., 2019; Smith and Gevins, 2004). Fronto-central increase in theta and gamma activities has been proven essential for memory-related cognitive functions (Shestyuk et al., 2019). Differential entropy combined with asymmetry gives out features such as differential and rational asymmetry for EEG segments are some recent developments as forward-fed features for neural networks (Duan et al., 2013; Torres P. et al., 2020).

In an attempt to classify emotions using EEG signals, many time-domain, frequency-domain, continuity, complexity (Gao et al., 2019; Galvão et al., 2021), statistical, microstate (Milz et al., 2016; Lehmann, 1990; Shen et al., 2020b), wavelet-based (Jie et al., 2014). Empirical features (Subasi et al., 2021; Patil et al., 2019) have been used to aid better classification results using advanced ensemble learning techniques (Fang et al., 2021) or using deep networks, often referred to as bag of deep features (Asghar et al., 2019). We have summarized the latest studies using EEG to recognize the emotional state in Table ??

This paper is organized as follows. Section 2 provides description of the three datasets used for our analysis. The theoretical background and the details of pre-processing steps (referencing, filtering, motion artifact and rejection and repair of bad trials) are discussed in section 3. Section 4 addresses the feature extraction details and provides overview of features extracted. Section 5 describes the feature selection procedure adapted in this work. Section 6 presents our experiments and results. This is followed by section 7 for discussion of experiments performed and results obtained in this work. Finally, Section 8 summarizes the conclusion and future scope of this work.

## **MATERIALS AND METHODS**

### **2 DATASETS**

#### **2.1 OASIS EEG dataset**

##### **2.1.1 Stimuli selection**

The OASIS image dataset (Kurdi et al., 2016) consists of a total 900 images from various categories such as natural locations, people, events, inanimate objects with various valence and arousal elicitation values. Out of 900 images, 40 images were selected to cover the whole spectrum of valence and arousal ratings as shown in Fig 1.

##### **2.1.2 Participants and device**

The experiment was conducted in a closed room with the only source of light being the digital 21” Samsung 1080p monitor. Data was collected from fifteen participants of mean age 22 with ten males and five females using EMOTIV Epoc EEG headset consisting of 14 electrodes according to the 10-20 montage system at a sampling rate of 128Hz and only the EEG data corresponding to the image viewing time were segmented using markers and used for analysis.

**Table 1.** Table summarising various machine learning algorithms and features used to classify emotions on various datasets, reported with accuracy

| Dataset     | Classifier | Feature extraction method                                                                                                                                                          | Accuracy (%)                       | Ref                      |
|-------------|------------|------------------------------------------------------------------------------------------------------------------------------------------------------------------------------------|------------------------------------|--------------------------|
| DEAP        | kNN        | Gray-Level Co-occurrence Matrix; Spectral Power Density                                                                                                                            | 79.58 (Average)                    | (Jadhav et al., 2017)    |
| DEAP        | kNN        | Relative Power Energy; Logarithmic Relative Power Energy; Absolute Logarithmic; Relative Power Energy                                                                              | 67.51, 68.55, 65.10 (VAD)          | (Verma and Tiwary, 2017) |
| DEAP        | SVM        | Hjorth parameters; Entropy; Power of Frequency bands; RASM; DASM; Energy of frequency bands using wavelets                                                                         | 65.72 (10 fold CV); 65.92 (LOO-CV) | (Khateeb et al., 2021)   |
| DEAP        | GNB        | Spectral power; Spectral power differential asymmetry                                                                                                                              | 61.6, 64.7, 61.8 (VAD)             | (Koelstra et al., 2012)  |
| Video Clips | kNN        | Absolute logarithmic Recoursing; Energy Efficiency of alpha, beta, and gamma bands decomposed using db4 wavelet function                                                           | 83.26                              | (M et al., 2010)         |
| Movie Clips | SVM        | Power spectrum and wavelet decomposition of frequency bands; Entropy exponent; Katz fractal dimension; Feature smoothening using LDS; Feature reduction using PCA, LDA and CFS     | 87.53 (Best accuracy)              | (Wang et al., 2011a)     |
| DEAP        | 2k-NN      | Spectral power of frequency bands; Spectral power difference of symmetric electrodes; Histogram parameters of segment level probability vectors; Dirichlet distribution parameters | 76.9, 68.4, 73.9, 75.3 (VADL)      | (Wang et al., 2014)      |

103 The study was approved by the Institutional Ethics Committee of BITS, Pilani (IHEC-40/16-1). All EEG  
 104 experiments/methods were performed in accordance with the relevant guidelines and regulations as per the  
 105 Institutional Ethics Committee of BITS, Pilani. All participants were explained the experiment protocol  
 106 and written consent for recording the EEG data for research purpose was obtained from each of the subject.

### 107 2.1.3 Protocol

108 The subjects were explained the meaning of valence and arousal before the start of the experiment and  
 109 were seated at a distance of 80-100 cms from the monitor.

110 The images were shown for 5 seconds through Psychopy (Peirce et al., 2019), and the participants were  
 111 asked to rate valence and arousal on a scale of 1 to 10 before proceeding to the next image, as shown  
 112 in Fig 2. The ratings given in the OASIS image dataset were plotted against the ratings reported by the  
 113 participants in order to draw correlation between them, as shown in Fig 3.

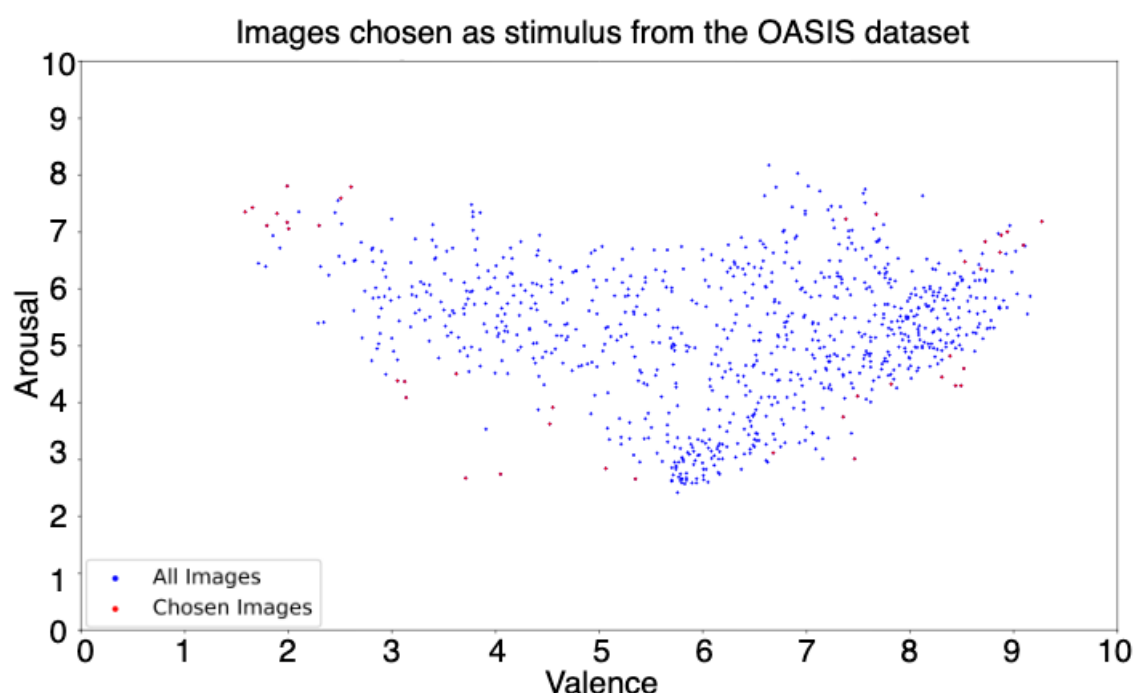

**Figure 1. Valence and arousal ratings of OASIS dataset.** Valence and arousal ratings of entire OASIS (Kurdi et al., 2016) image dataset (blue) and of the images selected for our experiment (red). The images were selected to represent each quadrant of the 2D space.

## 114 2.2 DEAP

115 DEAP dataset(Koelstra et al., 2012) has 32 subjects; each subject was shown 40 music videos one  
116 min long. Participants rated each video in terms of arousal levels, valence, like/dislike, dominance, and  
117 familiarity. Data was recorded using 40 EEG electrodes placed according to standard 10-20 montage  
118 system. The sampling frequency was 128Hz. In this analysis, we consider only 14 channels (AF3, F7, F3,  
119 FC5, T7, P7, O1, O2, P8, T8, FC6, F4, F8, AF4) for the sake of uniformity with other two datasets.

## 120 2.3 DREAMER

121 DREAMER(Katsigiannis and Ramzan, 2018) dataset has 23 subjects; each subject was shown 18 videos  
122 at a sampling frequency 128Hz. Audio and visual stimuli in the form of film clips were employed to  
123 elicit emotional reactions to the participants of this study and record EEG and ECG data. After viewing  
124 each film clip, participants were asked to evaluate their emotion by reporting the felt arousal (ranging  
125 from uninterested/bored to excited/alert), valence (ranging from unpleasant/stressed to happy/elated), and  
126 dominance. Data was recorded using 14 EEG electrodes.

## 3 PREPROCESSING

127 Raw EEG signals extracted out of the recording device are continuous, unprocessed signals containing  
128 various kinds of noise, artifacts and irrelevant neural activity. Hence, lack of EEG pre-processing can  
129 reduce the signal-to-noise ratio and introduce unwanted artifacts into the data. In pre-processing step,  
130 noise and artifacts presented in the raw EEG signals are identified and removed to make them suitable for



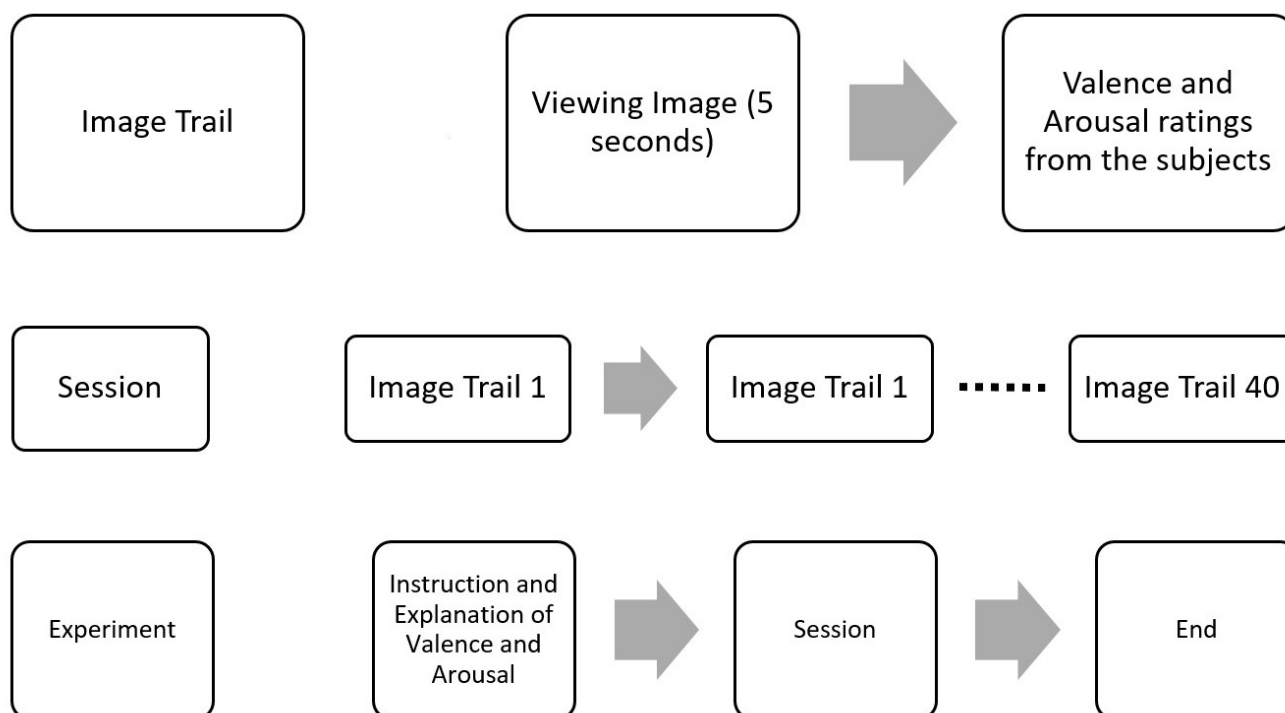

**Figure 2. EEG Data collection protocol** Experiment protocol for the collection of EEG data. 40 images from OASIS dataset were shown to elicit emotion in valence and arousal plane. After presenting each image, ratings were collected from participant.

131 analysis on the further stages of experiment. The following subsections discuss each step of pre-processing  
 132 (referencing, filtering, motion artifact and rejection and repair of bad trials) in more detail.

### 133 3.1 Referencing

134 The average amplitude of all electrodes for a particular time point was calculated and subtracted from the  
 135 data of all electrodes. This was done for all time points across all trials.

### 136 3.2 Filtering

137 A Butterworth bandpass filter of 4<sup>th</sup> order was applied to filter out frequencies between 0.1Hz and 40Hz

### 138 3.3 Motion Artifact

139 Motion artifacts can be removed by using Pearson Coefficients (Onikura et al., 2015). The gyroscopic  
 140 data (accelerometer readings) and EEG data were taken corresponding to each trial. Each of these trials  
 141 of EEG data was separated into its independent sources using Independent Component Analysis (ICA)  
 142 algorithm. For the independent sources obtained corresponding to a single trial, Pearson coefficients were  
 143 calculated between each source signal and each axis of accelerometer data for the corresponding trial. The  
 144 mean and standard deviations of Pearson coefficients were then calculated for each axis obtained from  
 145 overall sources. The sources that had Pearson coefficient 2 standard deviations above mean for any one  
 146 axis were high pass filtered for 3Hz using a Butterworth filter as motion artifacts exist at these frequencies.  
 147 The corrected sources were then projected back into the original dimensions of the EEG data using the  
 148 mixing matrix given by ICA.

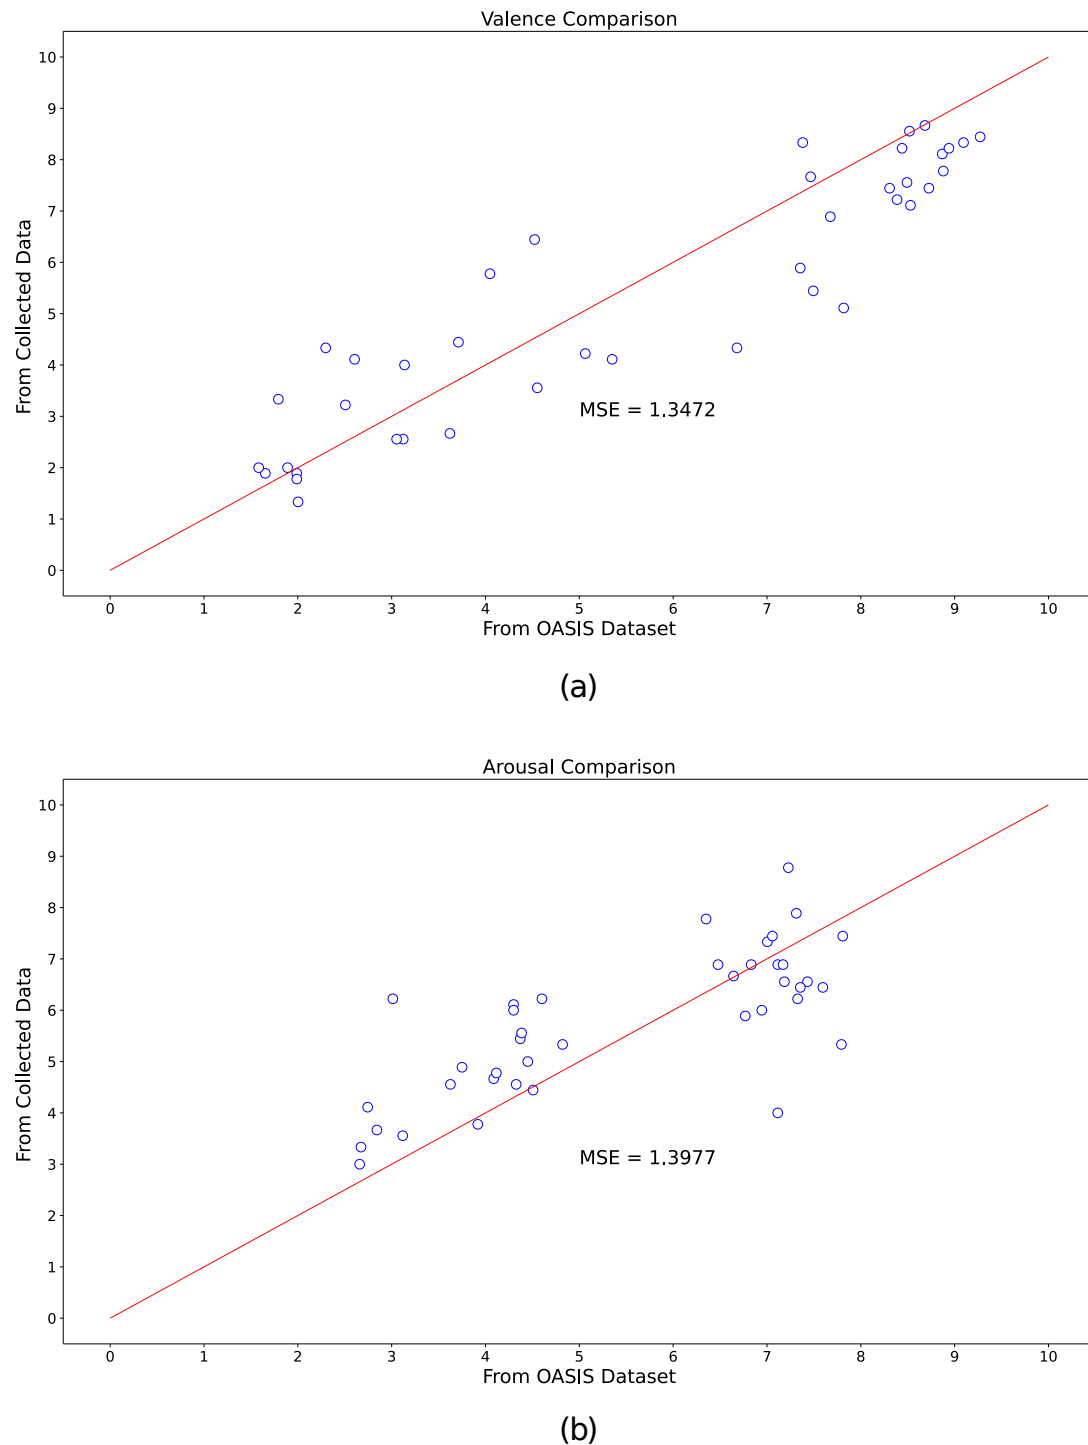

**Figure 3. Comparison of actual and self-reported valence and arousal ratings.** Valence and arousal ratings reported by the participants during the EEG data collection and ratings from the OASIS image dataset.

### 3.4 Rejection and repair of bad trials

Auto Reject is an algorithm developed by Mainak et al. (Jas et al., 2017) for the rejection of bad trials in Magneto-/Electro- encephalography (M/EEG data), using a cross-validation framework to find the optimum peak to peak threshold to reject data.

- We first consider a set of candidate thresholds  $\phi$ .
- Given a matrix of dimensions (epochs x channels x time points) by  $X \in \mathbb{R}^{N \times P}$ , where  $N$  is the number of trials/epochs  $P$  is the number of features.  $P = Q \times T$ ,  $Q$  being the number of sensors, and  $T$  the number of time points per sensor.
- The matrix is split into  $K$  folds. Each of the  $K$  parts will be considered the training set once, and the rest of the  $K-1$  parts become the test set.
- For each candidate threshold, i.e. for each

$$T_l \in \phi$$

we apply this candidate peak to peak threshold(otp) to reject trials in training set known as bad trials, and the rest of the trials become the good trials in the training set.

$$otp(X_i) = \max(X_i) - \min(X_i)$$

where  $X_i$  indicates a particular trial.

- $A$  is the peak to peak threshold of each trial,  $G_l$  is the set of trials whose otp is less than the candidate threshold being considered

$$A = \{otp(X_i) | i \in train_k\}$$

$$G_l = \{i \in train_k | otp(X_i) < T_l\}$$

- Then the mean amplitude of the good trials (for each sensor and their corresponding set of time points) is calculated

$$\bar{X} = \frac{1}{N} \sum_{i=1}^N X_i$$

- While the median amplitude of all trials is calculated for the test set  $\tilde{X}_{val_k}$
- Now the Frobenius norm is calculated for all  $K$  folds giving  $K$  errors  $e_k \in E$ ; mean of all these errors is mapped to the corresponding candidate threshold.

$$e_{kl} = \|\bar{X}_{G_l} - \tilde{X}_{val_k}\|_{Fro}$$

- The following analysis was done taking all channels into consideration at once, thus it is known as auto-reject global
- Similar process can be considered where analysis can be done for each channel independently i.e data matrix becomes(epochs x 1 x time points) known as the local auto-reject, where we get optimum thresholds for each sensor independently.
- The most optimum threshold is the one that gives the least error

$$T_* = T_{l_*} \text{ with } l_* = \operatorname{argmin}_l \frac{1}{K} \sum_{i=1}^K e_{kl}$$



As bad trials were already rejected in the DEAP and DREAMER dataset, we do not perform automatic trial rejection in them.

## 4 FEATURE EXTRACTION

In this work, the following set of 36 features were extracted from the EEG signal data with the help of EEGExtract library (Saba-Sadiya et al., 2020) for all three datasets:

- Shannon Entropy (S.E.)
- Subband Information Quantity for Alpha [8 Hz - 12 Hz], Beta [12 Hz - 30 Hz], Delta [0.5 Hz - 4 Hz], Gamma [30 Hz - 45 Hz] and Theta[4 Hz - 8 Hz] band (S.E.A., S.E.B., S.E.D., S.E.G., S.E.T.)
- Hjorth Mobility (H.M.)
- Hjorth Complexity (H.C.)
- False Nearest Neighbour (F.N.N)
- Differential Asymmetry (D.A., D.B., D.D., D.G., D.T.)
- Rational Asymmetry (R.A., R.B., R.D., R.G., R.T.)
- Median Frequency (M.F.)
- Band Power (B.P.A., B.P.B., B.P.D., B.P.G., B.P.T.)
- Standard Deviation (S.D.)
- Diffuse Slowing (D.S.)
- Spikes (S.K.)
- Sharp spike (S.S.N.)
- Delta Burst after Spike (D.B.A.S.)
- Number of Bursts (N.B.)
- Burst length mean and standard deviation (B.L.M., B.L.S.)
- Number ofSuppressions (N.S.)
- Suppression length mean and standard deviation (S.L.M., S.L.S.)

These features were extracted with a 1s sliding window and no overlap. The extracted features can be categorized into two different groups based on the ability to measure the complexity and continuity of the EEG signal. The reader is encouraged to refer to the work done by Ghassemi et al. (Ghassemi, 2018) for an in-depth discussion of these features.

### 4.1 Complexity Features

Complexity features represent the degree of randomness and irregularity associated with the EEG signal. Different features in the form of entropy and complexity measures were extracted to gauge the information content of non-linear and non-stationary EEG signal data.

#### 4.1.1 Shannon Entropy

Shannon entropy (Shannon, 1948) is a measure of uncertainty (or variability) associated with a random variable. Let  $X$  be a set of finite discrete random variables  $X = \{x_1, x_2, \dots, x_m\}, x_i \in R^d$ , Shannon

211 entropy,  $H(X)$ , is defined as

$$H(X) = -c \sum_{i=0}^m p(x_i) \ln p(x_i) \quad (1)$$

212 where  $c$  is a positive constant and  $p(x_i)$  is the probability of  $(x_i) \in X$  such that:

$$\sum_{i=0}^m p(x_i) = 1 \quad (2)$$

213 Higher values of entropy are indicative of high complexity and less predictability in the system. (Phung  
214 et al., 2014)

#### 215 4.1.2 Subband Information Quantity

216 Sub-band Information Quantity (SIQ) refers to the entropy of the decomposed EEG wavelet signal for  
217 each of the five frequency bands.(Jia et al., 2008; Valsaraj et al., 2020). In our analysis, the EEG signal was  
218 decomposed using a butter-worth filter of order 7 followed by an FIR/IIR filter. Shannon entropy ( $H(X)$ )  
219 of this resultant wave signal is the desired SIQ of a particular frequency band. Due to its tracking capability  
220 for dynamic amplitude change and frequency component change, this feature has been used to measure the  
221 information contained in the brain (Shin et al., 2006; Kanungo et al., 2021).

#### 222 4.1.3 Hjorth Parameters

223 Hjorth Parameters indicate time-domain statistical properties introduced by Bo Hjorth in 1970 (Hjorth,  
224 1970). Variance-based calculation of Hjorth parameters incurs a low computational cost which makes  
225 them appropriate for performing EEG signal analysis. We make use of complexity and mobility (Das and  
226 Pachori, 2021) parameters in our analysis. Hjorth mobility signifies the mean frequency or the proportion  
227 of standard deviation of the power spectrum. It is defined as :

$$\text{Hjorth}_{\text{Mobility}} = \sqrt{\frac{\text{var}\left(\frac{dx(t)}{dt}\right)}{\text{var}(x(t))}} \quad (3)$$

228 where  $\text{var}(\cdot)$  denotes the variance operator and  $x(t)$  denotes the EEG time-series signal.

229 Hjorth complexity signifies the change in frequency. This parameter has been used to get a measure of  
230 similarity of the signal to a sine wave. It is defined as:-

$$\text{Hjorth}_{\text{Complexity}} = \frac{\text{Mobility}\left(\frac{dx(t)}{dt}\right)}{\text{Mobility}(x(t))} \quad (4)$$

#### 231 4.1.4 False Nearest Neighbour

232 False Nearest Neighbour is a measure of signal continuity and smoothness. It is used to quantify the  
233 deterministic content in the EEG time series data without assuming chaos(Kennel et al., 1992; Hegger and  
234 Kantz, 1999).

## 235 4.1.5 Asymmetry features

236 We incorporate Differential Entropy (DE) (Zheng et al., 2014) in our analysis to construct two features  
237 for each of the five frequency bands, namely, Differential Asymmetry (DASM) and Rational Asymmetry  
238 (RASM). Mathematically, DE ( $h(X)$ ) is defined as :

$$h(X) = - \int_{-\infty}^{\infty} \frac{1}{\sqrt{2\pi\sigma^2}} \exp \frac{(x - \mu)^2}{2\sigma^2} \log \frac{1}{\sqrt{2\pi\sigma^2}} \exp \frac{(x - \mu)^2}{2\sigma^2} dx = \frac{1}{2} \log 2\pi e \sigma^2 \quad (5)$$

239 where  $X$  follows the Gauss distribution  $N(\mu, \sigma^2)$ ,  $x$  is a variable and  $\pi$  and  $\exp$  are constant.

240 Differential Asymmetry(or DASM) (Duan et al., 2013) for each frequency band were calculated as the  
241 difference of differential entropy of each of 7 pairs of hemispheric asymmetry electrodes.

$$DASM = h(X_i^{\text{left}}) - h(X_i^{\text{right}}) \quad (6)$$

243 Rational Asymmetry(or RASM) (Duan et al., 2013) for each frequency band were calculated as the ratio  
244 of differential entropy between each of 7 pairs of hemispheric asymmetry electrodes.

$$RASM = h(X_i^{\text{left}}) / h(X_i^{\text{right}}) \quad (7)$$

## 245 4.2 Continuity Features

246 Continuity features signify the clinically relevant signal characteristics of EEG signals(Hirsch et al., 2013;  
247 Ghassemi, 2018). These features have been acclaimed to serve as qualitative descriptors of states of the  
248 human brain and hence, are important towards the process of emotion recognition.

### 249 4.2.1 Median Frequency

250 Median Frequency refers to the 50% quantile or median of the power spectrum distribution. Median  
251 Frequency has been studied extensively in the past due to its observed correlation with awareness  
252 (Schwilden, 1989) and its ability to predict imminent arousal(Drummond et al., 1991). It is a frequency  
253 domain or spectral domain feature.

### 254 4.2.2 Band Power

255 Band power refers to the average power of the signal in a specific frequency band. The band powers of  
256 delta, theta, alpha, beta, and gamma were used as spectral features. To calculate band power, initially,  
257 a butter-worth filter of order 7 was applied on the EEG signal. IIR/FIR filter was applied further on the  
258 EEG signal in order to separate out signal data corresponding to a specific frequency band. Average of  
259 the power spectral density was calculated using a periodogram of the resulting signal. Signal Processing  
260 sub module (scipy.signal) of SciPy library (Virtanen et al., 2020) in python was used to compute the band  
261 power feature.

### 262 4.2.3 Standard Deviation

263 Standard Deviation has proved to be an important time-domain feature in the past experiments (Amin  
264 et al., 2017; Panat et al., 2014). Mathematically, it is defined as the square root of variance of EEG signal  
265 segment.

### 266 4.2.4 Diffuse Slowing

267 Previous studies (Boutros, 1996) have shown that diffuse slowing is correlated with impairment  
268 in awareness, concentration, and memory and hence, it is an importance feature for estimation of  
269 valence/arousal levels from EEG signal data.

### 270 4.2.5 Spikes

271 Spikes(Hirsch et al., 2013) refer to the peaks in the EEG signal up to a threshold, fixed at mean + 3  
272 standard deviation. The number of spikes was computed by finding local minima or peaks in EEG signal  
273 over 7 samples using `scipy.signal.find_peaks` method from SciPy library (Virtanen et al., 2020).

### 274 4.2.6 Delta Burst after spike

275 The change in delta activity after and before a spike computed epoch wise by adding mean of 7 elements  
276 of delta band before and after the spike, used as a continuity feature.

### 277 4.2.7 Sharp spike

278 Sharp spikes refer to spikes which last less than 70ms and is a clinically important feature in study of  
279 electroencephalography (Hirsch et al., 2013).

### 280 4.2.8 Number of Bursts

281 The number of amplitude bursts(or simply number of bursts) constitutes a significant feature (Hirsch  
282 et al., 2013).

### 283 4.2.9 Burst length mean and standard deviation

284 Statistical properties of the bursts, mean  $\mu$  and standard deviation  $\sigma$  of the burst lengths, have been used  
285 as continuity features.

### 286 4.2.10 Number ofSuppressions

287 Burst Suppression refers to a pattern where high voltage activity is followed by an inactive period and is  
288 generally a characteristic feature of deep anaesthesia(Ching et al., 2012). We use the number of contiguous  
289 segments with amplitude suppressions as a continuity feature with a threshold fixed at  $10\mu$  (Saba-Sadiya  
290 et al., 2020).

### 291 4.2.11 Suppression length mean and standard deviation

292 Statistical properties like mean  $\mu$  and standard deviation  $\sigma$  of the suppression lengths, used as a continuity  
293 feature.

## 5 FEATURE SELECTION

294 Selecting the correct predictor variables or feature vectors can improve the learning process in any machine  
295 learning pipeline. In this work, initially, sklearn's (Pedregosa et al., 2011) VarianceThreshold feature

selection method was used to remove zero-variance or constant features from the set of 36 extracted EEG features. Next, a subset of 25 features common to all 3 datasets (DREAMER, DEAP, and OASIS) was selected after applying the VarianceThreshold method for further analysis. This was done to validate our approach on a common set of features. The set of 11 features (S.E., F.N.N., D.S., S.K., D.B.A.S., N.B., B.L.M., B.L.S., N.S., S.L.M., S.L.S.) were excluded from further analysis. In our study, SelectKBest is used as a feature ranking and selection technique for all 3 datasets.

SelectkBest (Pedregosa et al., 2011) is a filter-based, univariate feature selection method intended to select and retain first k-best features based on the scores produced by univariate statistical tests. In our work, f\_regression was used as the scoring function since valence and arousal are continuous numeric target variables. It uses Pearson correlation coefficient as defined in Eq 8 to compute the correlation between each feature vector in the input matrix, X and target variable, y as follows:

$$\rho_i = \frac{(X[:, i] - \text{mean}(X[:, i])) * (y - \text{mean}(y))}{\text{std}(X[:, i]) * \text{std}(y)} \quad (8)$$

The corresponding F-value is then calculated as:

$$F_i = \frac{\rho_i^2}{1 - \rho_i^2} * (n - 2) \quad (9)$$

where n is the number of the samples.

SelectkBest method then ranks the feature vectors based on F-scores returned by f\_regression method. Higher scores correspond to better features.

## 6 RESULTS

### 6.1 Electrodes ranking and selection

The electrodes were ranked for the three datasets, using the SelectKBest method, as discussed in Section 5 and the ranks are tabulated for valence and arousal labels in Table 2. To produce a ranking for Top N electrodes taken together, feature data for top i electrodes were initially considered. The resultant matrix was split in the ratio 80:20 for training and evaluation of the random forest regressor model. The procedure was repeated until all the 14 electrodes were taken into account. The RMSE values for the same are shown in Fig 4 (a). It should be noted that, unlike feature analysis, data corresponding to 5 features each of DASM and RASM was excluded from the Top N electrode-wise RMSE study since these features are constructed using pairs of opposite electrodes.

### 6.2 Features ranking and selection

Each extracted feature was used to generate its corresponding feature matrix of shape (nbChannels, nbSegments). These feature matrices were then ranked using SelectKBest feature selection method. Initially, a feature matrix for the best feature was generated. The ranks were tabulated for valence and arousal labels in Table 3. This data was split into 80:20 train-test data, the training data was used to perform regression with Random Forest Regressor and predicted values on test data were compared with actual test labels, and RMSE was computed. In the second run, feature matrices of best and second-best features were

**Table 2.** Electrode Ranking for valence label (V) and arousal label (A) based on SelectKBest feature selection method.

| Electrode | DREAMER |    | DEAP |    | OASIS |    |
|-----------|---------|----|------|----|-------|----|
|           | A       | V  | A    | V  | A     | V  |
| AF3       | 10      | 13 | 10   | 8  | 7     | 6  |
| AF4       | 9       | 11 | 12   | 10 | 8     | 8  |
| F3        | 11      | 10 | 7    | 11 | 5     | 5  |
| F4        | 13      | 14 | 8    | 6  | 6     | 9  |
| F7        | 14      | 12 | 1    | 1  | 1     | 1  |
| F8        | 3       | 5  | 2    | 2  | 4     | 4  |
| FC5       | 5       | 9  | 14   | 14 | 10    | 7  |
| FC6       | 6       | 4  | 3    | 4  | 9     | 10 |
| O1        | 12      | 8  | 13   | 7  | 11    | 11 |
| O2        | 8       | 3  | 6    | 9  | 14    | 13 |
| P7        | 4       | 2  | 5    | 3  | 12    | 12 |
| P8        | 7       | 6  | 4    | 5  | 13    | 14 |
| T7        | 1       | 7  | 9    | 13 | 3     | 2  |
| T8        | 2       | 1  | 11   | 12 | 2     | 3  |

combined, data was split into train and test data, model was trained, and predictions made by model on test data were used to compute RMSE. This procedure was followed until all the features are taken into account. The RMSE values for the feature analysis procedure, as described above, are shown in Fig 4 (b).

The identification of an optimum set of electrodes and features is a critical step. By optimum set, we imply the minimum number of electrodes and features that produce minimum RMSE during model evaluation, as shown in Fig 4. We can observe a general decline in RMSE value when the number of electrodes under consideration is increased. DREAMER dataset shows a much greater and smoother convergence than the other two datasets because more training data was available for training the model. In general, the minimum RMSE is observed when all 14 electrodes are selected. OASIS dataset can be excluded from this inference since it contained only 15 participants at the time of the experiment.

Fig 4 (b), reveals a general pattern about optimal set of features. On increasing the number of features in consideration, initially, there is a steady drop in the RMSE values followed by a gradual increase after a certain critical point in the graph. Hence, a minima can be observed in the graph. As discussed above, the OASIS dataset can be ruled out of this generalization. The minimum RMSE values and the corresponding number of best features and electrodes selected are summarized in Table 4 and Table 5 respectively.

## Incremental Learning

As given by the feature analysis described above, the best features were used to generate a feature matrix for valence and arousal for each dataset. The feature matrix was then used to train a random forest regressor as part of the incremental learning algorithm.

Incremental learning was performed based on the collection of subject data. Initially, the first subject data was taken, their trial order shuffled and then split using 80:20 train test size, the model was trained using train split, predictions were made for test data, next 2<sup>nd</sup> subject data was taken together with the 1<sup>st</sup> subject, trial order shuffled, again a train-test split taken and the random forest regressor model was trained using the train split. Predictions were made for the test split. This procedure was repeated until data of



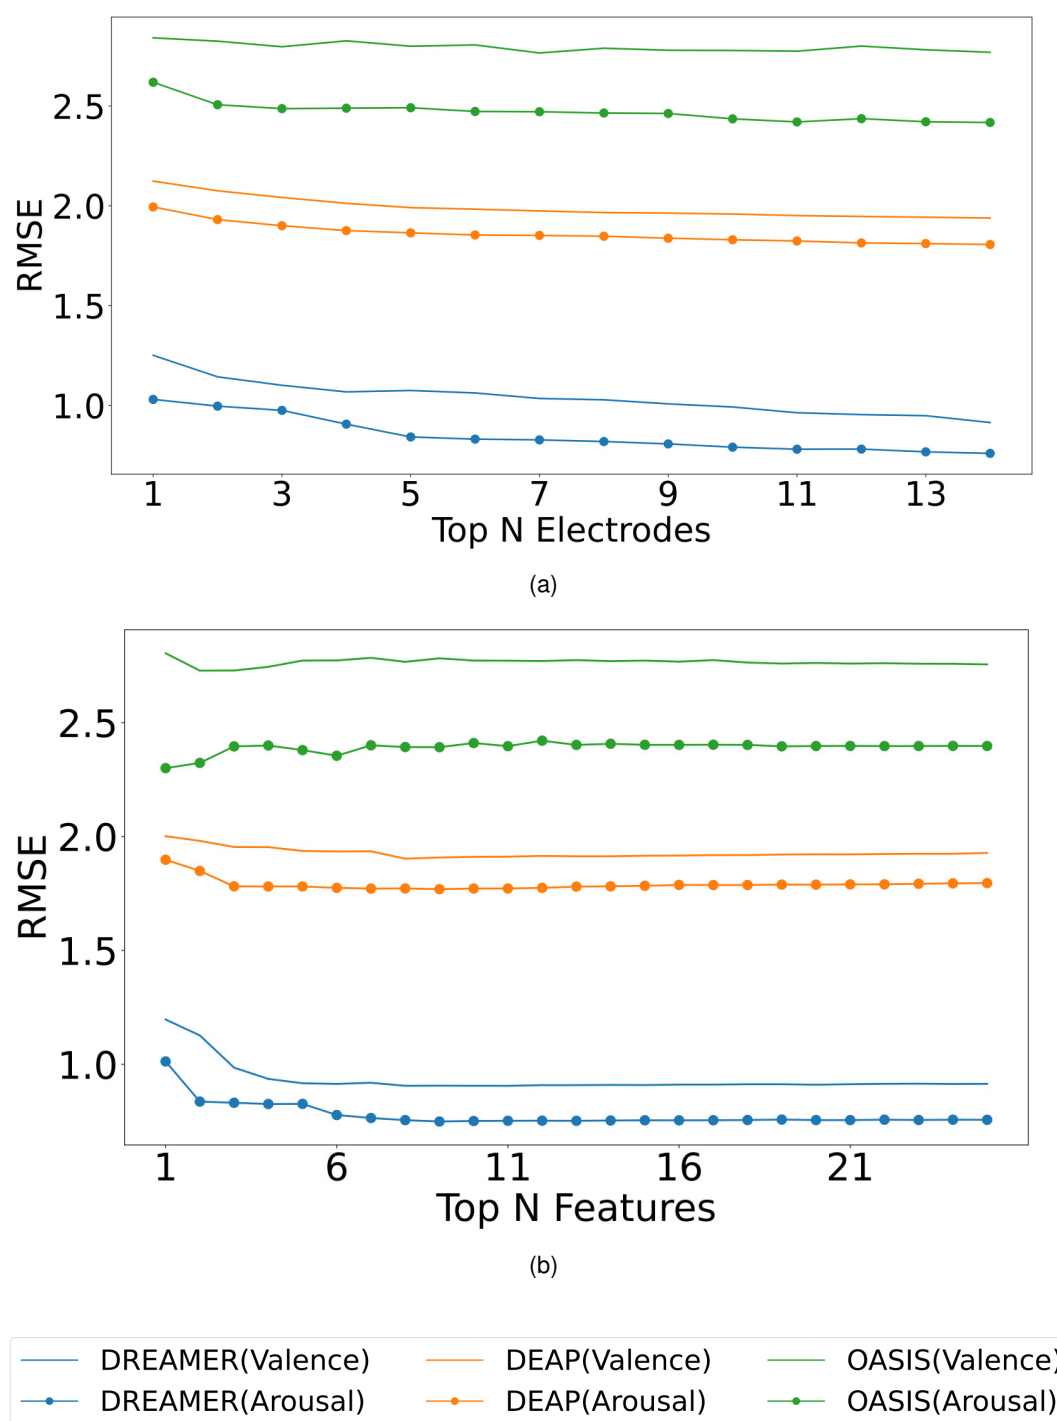

**Figure 4. Model evaluation for feature and electrode selection.** The random forest regressor was trained on the training set (80%) corresponding to top N electrodes (ranked using SelectKBest feature selection method) and RMSE was computed on the test set (20%) for valence (plain) and arousal (dotted) label on DREAMER, DEAP and OASIS EEG datasets as shown in (a). A similar analysis was performed for top N features for DREAMER, DEAP and OASIS EEG datasets as shown in (b).

all the subjects were used for RMSE computation. RMSE values for each training step, i.e. training data consisted of subject 1 data, then the combination of subject 1, 2 data, then the combination of subject 1, 2, 3 data, and so on. The plots generated for RMSE values for the individual steps of training show a general

**Table 3.** Feature Ranking for valence label(V) and arousal label (A) based on SelectKBest feature selection method

| Feature | DREAMER |    | DEAP |    | OASIS |    |
|---------|---------|----|------|----|-------|----|
|         | A       | V  | A    | V  | A     | V  |
| B.P.A.  | 7       | 5  | 18   | 17 | 25    | 15 |
| B.P.B.  | 9       | 8  | 8    | 7  | 11    | 13 |
| B.P.D.  | 22      | 22 | 23   | 22 | 12    | 23 |
| B.P.G.  | 21      | 18 | 3    | 13 | 5     | 20 |
| B.P.T.  | 20      | 20 | 19   | 18 | 24    | 17 |
| D.A.    | 4       | 11 | 12   | 10 | 16    | 9  |
| D.B.    | 12      | 10 | 4    | 4  | 21    | 11 |
| D.D.    | 24      | 25 | 16   | 16 | 20    | 21 |
| D.G.    | 16      | 16 | 5    | 6  | 14    | 18 |
| D.T.    | 13      | 14 | 10   | 9  | 23    | 16 |
| H.C.    | 2       | 4  | 20   | 20 | 4     | 4  |
| H.M.    | 6       | 3  | 17   | 19 | 1     | 2  |
| M.F.    | 14      | 12 | 24   | 25 | 7     | 5  |
| R.A.    | 5       | 13 | 21   | 21 | 15    | 12 |
| R.B.    | 11      | 9  | 1    | 2  | 19    | 10 |
| R.D.    | 23      | 24 | 25   | 24 | 18    | 22 |
| R.G.    | 17      | 17 | 2    | 1  | 13    | 19 |
| R.T.    | 15      | 15 | 11   | 11 | 22    | 14 |
| S.E.A.  | 10      | 7  | 13   | 12 | 10    | 24 |
| S.E.B.  | 3       | 2  | 6    | 5  | 3     | 3  |
| S.E.D.  | 18      | 19 | 15   | 15 | 8     | 7  |
| S.E.G.  | 1       | 1  | 9    | 8  | 2     | 1  |
| S.E.T.  | 19      | 21 | 14   | 14 | 9     | 8  |
| S.S.N.  | 25      | 23 | 22   | 23 | 17    | 25 |
| S.D.    | 8       | 6  | 7    | 3  | 6     | 6  |

**Table 4.** RMSE values for valence and arousal label on the test set (20%) of DEAP, DREAMER and OASIS dataset for optimum set of features.

| Dataset | Valence |       | Arousal |       |
|---------|---------|-------|---------|-------|
|         | N       | RMSE  | N       | RMSE  |
| DREAMER | 11      | 0.905 | 9       | 0.749 |
| DEAP    | 8       | 1.902 | 9       | 1.769 |
| OASIS   | 2       | 2.728 | 1       | 2.300 |

**Table 5.** RMSE values for valence and arousal label on the test set (20%) of DEAP, DREAMER and OASIS dataset for optimum set of electrodes.

| Dataset | Valence |       | Arousal |       |
|---------|---------|-------|---------|-------|
|         | N       | RMSE  | N       | RMSE  |
| DREAMER | 14      | 0.914 | 14      | 0.759 |
| DEAP    | 14      | 1.938 | 14      | 1.806 |
| OASIS   | 7       | 2.765 | 14      | 2.417 |

357 decreasing trend as evident from Fig 5.

358

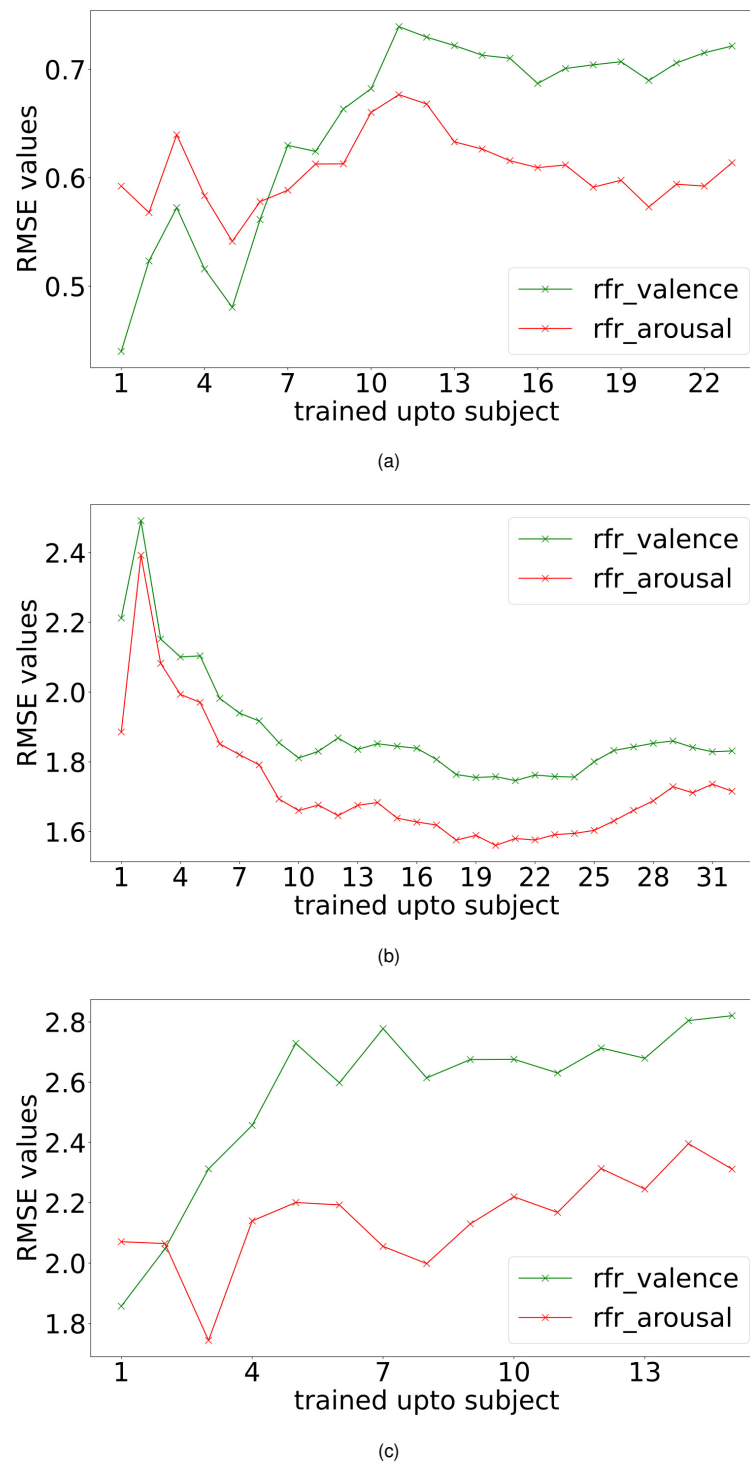

**Figure 5. Incremental learning performance.** Valence and arousal RMSE readings obtained with incremental learning for DREAMER (a), DEAP (b) and OASIS (c) EEG dataset using random forest regressor (rfr).

### 359 Leave-one-subject-out cross-validation

360 Subject generalization is a crucial problem in identifying EEG signal patterns. To prevent over-fitting and  
 361 avoid subject-dependent patterns. We train the model with data of all the subjects except a single subject

and evaluate the model on this remaining subject. Hence, the model is evaluated for each subject to identify subject bias and prevent any over-fitting. Also, when building a machine learning model, it is a standard practice to validate the results by leaving aside a portion of data as the test set. In this work, we used the leave-one-subject-out cross-validation technique due to its robustness for validating results for data set at the participant level. Leave-one-subject-out cross-validation is a k-fold cross-validation technique, where the number of folds, k, equals the number of participants in a dataset. The cross-validated RMSE values for the three datasets for all the participants are plotted in Fig 6.

Mean and standard deviation of RMSE values for valence and arousal label after cross validation have been summarized in Table 6. The best RMSE values lie within the standard deviation range respect to the leave-one-subject-out cross validation results and hence, inferences drawn from them can be validated.

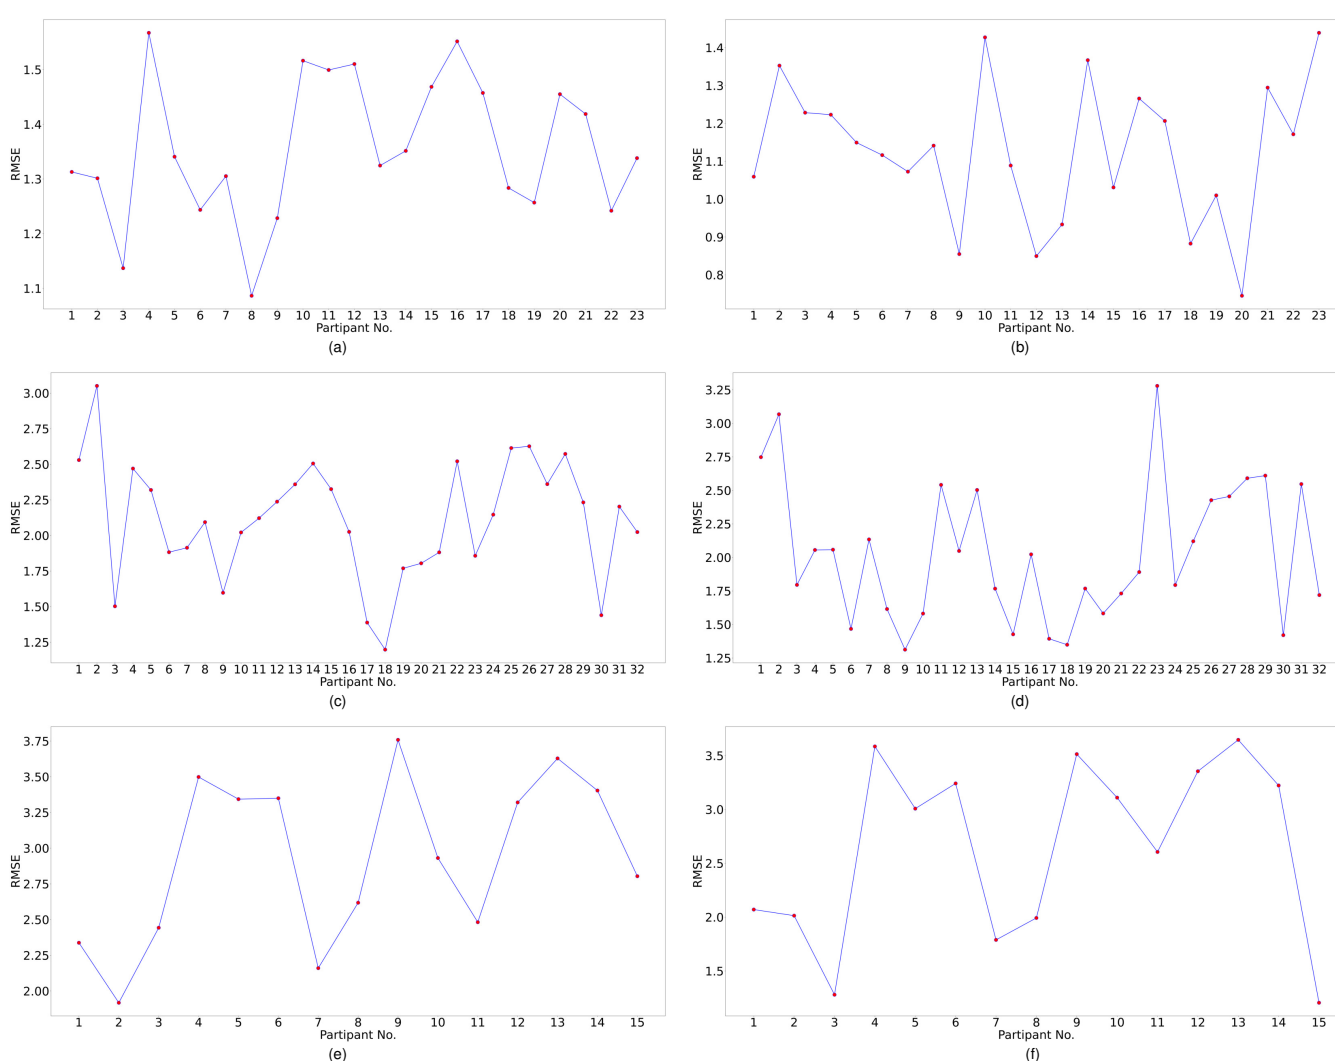

**Figure 6. Subject wise performance analysis for valence and arousal labels.** Leave-one-subject-out cross-validation performance analysis for valence label for (a) DREAMER (b) DEAP (c) OASIS datasets and for arousal label for (d) DREAMER (e) DEAP (f) OASIS datasets respectively. In this cross-validation technique, one subject was chosen as the test subject, and the models were trained on the data of the remaining subjects.

**Table 6.** Mean and Standard Deviation (Std. Dev.) of RMSE values for Valence and Arousal Label Data after Leave-one-subject-out-cross-validation

| Dataset | Label   | Mean  | Std. Dev. |
|---------|---------|-------|-----------|
| DREAMER | Valence | 1.356 | 0.130     |
|         | Arousal | 1.126 | 0.190     |
| DEAP    | Valence | 2.112 | 0.416     |
|         | Arousal | 2.025 | 0.519     |
| OASIS   | Valence | 2.933 | 0.582     |
|         | Arousal | 2.642 | 0.845     |

## 7 DISCUSSION

The relation between the performance (RMSE) and the number of participants is critical for any study concerning emotion recognition from the EEG dataset. As in Fig 5, we observe an improvement in performance with an increasing number of participants. This explains that the machine learning algorithm needs data from more participants for generalization. Interestingly, the performance degrades for the OASIS dataset (Fig 5 (c)) while increasing the number of participants. This could be explained as the model overfits when trained with data from a few subjects. This can be verified by the fact that the degradation in performance is only up to a certain number of subjects, as in Fig 5 (a). Hence, with data from more participants in the OASIS EEG dataset, we can expect to observe an increase in performance.

As shown in tables 2 and 3, 3 rankings were obtained as a result of 3 datasets for each label. For the valence labels, out of the top 25 % electrodes, 33 % were in the frontal regions (F3, F4, F7, F8, AF3, AF4, FC5, FC6), 33% in the temporal regions (T8, T7), 22 % the parietal regions (P7, P8), and 11 % in the occipital regions (O1, O2). For the top 50% electrodes, 57 % were in the frontal regions, 19 % in the temporal regions, 19 % in the parietal regions, and 4 % in the occipital regions.

For the arousal labels, out of the top 25 % electrodes, 55 % were in the frontal regions and 44 % in the temporal regions. For top 50% electrodes, 57 % were in the the frontal regions, 19 % in the temporal regions, 19 % in the parietal regions, and 4 % in the occipital regions.

Therefore, the frontal region was the most significant brain region for recognizing valence and arousal, followed by temporal, parietal, and occipital. This is in accordance with previous works on EEG channel selection (Alotaiby et al., 2015), (Shen et al., 2020a).

The optimum set of features for the DREAMER dataset was observed to be (S.E.G, S.E.B, H.M, H.C., B.P.A, S.D, S.E.A, B.P.B, R.B, D.B, D.A) for valence and (S.E.G, H.C, S.E.B, D.A, R.A, H.M, B.P.A, S.D, B.P.B) for arousal respectively. The minimum RMSE values obtained using these optimal features on the DREAMER dataset were 0.905 and 0.749 for valence and arousal dimensions, respectively, as evident from Table 4. Therefore these features were critical for recognizing emotional states and can be used in future studies to evaluate classifiers like Artificial Neural Networks and ensembles.

As shown in Table 3, band power and sub-band information quantity features for gamma and beta frequency bands performed better in the estimation of both valence and arousal than other frequency bands. Hence the gamma and beta frequency bands are the most critical for emotion recognition (Wang et al., 2011b), (Zheng et al., 2017).

It can be inferred from Tables 3 that H.M. was mostly ranked among the top 3 features for predicting valence labels and arousal labels. Similarly, H.C. was ranked among the top 4 features. This inference

is consistent with the previous studies that claim the importance of time-domain Hjorth parameters in accurate EEG classification tasks (Türk et al., 2017; Cecchin et al., 2010).

In the past, statistical properties like standard deviation derived from the reconstruction of EEG signals have been claimed to be significant descriptors of the signal and provide supporting evidence to the results obtained in this study (Malini and Vimala, 2016; Panda et al., 2010). It was observed that SD was ranked among the top 8 ranks in general.

Table 4 indicates that the minimum RMSE values obtained on the test set (20%) using the optimum set of features were 0.905 and 0.749 on the DREAMER dataset, 1.902 and 1.769 on the DEAP dataset and 2.728 and 2.3 on OASIS dataset for valence and arousal respectively. For leave-one-subject-out cross-validation, we achieved the best RMSE of 1.35, 1.126 on DREAMER, 2.11, 2.02 on DEAP and 2.93, 2.64 on the OASIS dataset for valence and arousal, respectively as shown in Fig 6.

## 8 CONCLUSION AND FUTURE SCOPE

EEG is a low-cost, noninvasive neuroimaging technique that provides high spatiotemporal information about brain activity, and it has become an indispensable tool for decoding cognitive neural signatures. However, the multi-stage intelligent signal processing method has several indispensable steps like pre-processing, feature extraction, feature selection, and classifier training. In this work, we propose a generalized open-source neural signal processing pipeline based on machine learning to accurately classify emotional index on a continuous valence-arousal plane using these EEG signals. We statistically investigated and validated artifact rejection, automated bad-trial rejection, state-of-the-art Spatio-temporal feature extraction techniques, and feature selection techniques on a self-curated dataset recorded from a portable headset in response to OASIS emotion elicitation image dataset and two open source EEG datasets. This published dataset could be used in future studies for a spectrum of intelligent signal processing methods like deep learning, reinforcement learning, and neuromorphic computing. The published simplistic python pipeline would aid researchers in focusing on innovation in specific signal processing steps like feature selection or machine learning without the need to recreate the entire pipeline from scratch. In accordance with neuroscience literature, our proposed system could identify the optimum set of electrodes and features that produce minimum RMSE during emotion classification for a given dataset. It also validated the claim that beta and gamma frequency bands are more effective than other bands when it comes to emotion classification. We performed the evaluation of EEG activity induced by videos (DEAP), and static images (DREAMER & OASIS), but not on audio stimulus. The OASIS dataset collection was limited to 15 participants due to the Covid-19 pandemic. In future we plan to collect the data for at least 40 participants to draw stronger inferences. Future work would also include analysis of end to end neural networks and transfer learning for the purpose of emotion recognition. The published dataset can be used for further advancement of machine learning systems for emotional state detection with a data recorded from portable headset. The published EEG processing pipeline of artifact rejection, feature extraction, feature ranking, feature selection and machine learning could be expanded and adapted for processing EEG signal in response to variety of stimuli.

## AUTHOR CONTRIBUTIONS

N.G. conceptualized the research. R.G., N.G., A.A. performed the experiments and analyzed the data. V.B. supervised the study. All authors approved and contributed in writing the manuscript.



## ACKNOWLEDGMENTS

We acknowledge Mr. Parrivesh N.S. and Mr. V.A.S. Abhinav for their valuable suggestions and assistance in data collections during the planning and initial development of this research work. We acknowledge the support from Ironwork Insights Inc. This work was supported by the Department of Science and technology, Government of India, vide Reference No:SR/CSI/50/2014(G)through the Cognitive Science Research Initiative (CSRI). We acknowledge financial supports from the EU: ERC-2017-COG project IONOS (GA 773228)

## DATA AVAILABILITY STATEMENTS

The dataset recorded in this study would be made available in public domain upon acceptance of manuscript. The code repository developed would be published at:  
[https://github.com/rohitgarg025/Decoding\\_EEG](https://github.com/rohitgarg025/Decoding_EEG)

## REFERENCES

- Alotaiby, T., Abd El-Samie, F. E., Alshebeili, S. A., and Ahmad, I. (2015). A review of channel selection algorithms for eeg signal processing. *EURASIP Journal on Advances in Signal Processing* 2015, 1–21
- Amin, H. U., Mumtaz, W., Subhani, A. R., Saad, M. N. M., and Malik, A. S. (2017). Classification of eeg signals based on pattern recognition approach. *Frontiers in computational neuroscience* 11, 103
- Asghar, M. A., Khan, M. J., Fawad, Amin, Y., Rizwan, M., Rahman, M., et al. (2019). EEG-based multi-modal emotion recognition using bag of deep features: An optimal feature selection approach. *Sensors (Switzerland)* 19, 1–16. doi:10.3390/s19235218
- Bauer, E. P., Paz, R., and Paré, D. (2007). Gamma oscillations coordinate amygdalo-rhinal interactions during learning. *Journal of Neuroscience* 27, 9369–9379. doi:10.1523/JNEUROSCI.2153-07.2007
- Berens, P., Keliris, G. A., Ecker, A. S., Logothetis, N. K., and Tolias, A. S. (2008). Comparing the feature selectivity of the gamma-band of the local field potential and the underlying spiking activity in primate visual cortex. *Frontiers in Systems Neuroscience* 2, 199–207. doi:10.3389/neuro.06.002.2008
- Boutros, N. N. (1996). Diffuse electroencephalogram slowing in psychiatric patients: a preliminary report. *Journal of Psychiatry and Neuroscience* 21, 259
- Cecchin, T., Ranta, R., Koessler, L., Caspary, O., Vespignani, H., and Maillard, L. (2010). Seizure lateralization in scalp eeg using hjorth parameters. *Clinical neurophysiology* 121, 290–300
- Ching, S., Purdon, P. L., Vijayan, S., Kopell, N. J., and Brown, E. N. (2012). A neurophysiological–metabolic model for burst suppression. *Proceedings of the National Academy of Sciences* 109, 3095–3100. doi:10.1073/pnas.1121461109
- Coan, J. A., Allen, J. J., and Harmon-Jones, E. (2001). Voluntary facial expression and hemispheric asymmetry over the frontal cortex. *Psychophysiology* 38, 912–925. doi:10.1111/1469-8986.3860912
- Das, K. and Pachori, R. (2021). Schizophrenia detection technique using multivariate iterative filtering and multichannel eeg signals. *Biomedical Signal Processing and Control* 67. doi:10.1016/j.bspc.2021.102525
- Davidson, R. J., Ekman, P., Saron, C. D., Senulis, J. A., and Friesen, W. V. (1990). Approach-Withdrawal and Cerebral Asymmetry: Emotional Expression and Brain Physiology I. *Journal of Personality and Social Psychology* 58, 330–341. doi:10.1037/0022-3514.58.2.330

- 479 Drummond, J., Brann, C., Perkins, D., and Wolfe, D. (1991). A comparison of median frequency, spectral  
480 edge frequency, a frequency band power ratio, total power, and dominance shift in the determination of  
481 depth of anesthesia. *Acta Anaesthesiologica Scandinavica* 35, 693–699
- 482 Duan, R.-N., Zhu, J.-Y., and Lu, B.-L. (2013). Differential entropy feature for eeg-based emotion  
483 classification. In *2013 6th International IEEE/EMBS Conference on Neural Engineering (NER)* (IEEE),  
484 81–84
- 485 Eerola, T. and Vuoskoski, J. K. (2011). A comparison of the discrete and dimensional models of emotion  
486 in music. *Psychology of Music* 39, 18–49. doi:10.1177/0305735610362821
- 487 [Dataset] Ekman, P. (1972). Universals and Cultural Differences in Facial Expressions of Emotion BT -  
488 Nebraska Symposium on Motivation
- 489 Fang, Y., Yang, H., Zhang, X., Liu, H., and Tao, B. (2021). Multi-Feature Input Deep Forest for EEG-Based  
490 Emotion Recognition. *Frontiers in Neurorobotics* 14, 1–11. doi:10.3389/fnbot.2020.617531
- 491 Galvão, F., Alarcão, S. M., and Fonseca, M. J. (2021). Predicting exact valence and arousal values from  
492 EEG. *Sensors* 21. doi:10.3390/s21103414
- 493 Gao, Z., Cui, X., Wan, W., and Gu, Z. (2019). Recognition of emotional states using multiscale information  
494 analysis of high frequency EEG oscillations. *Entropy* 21. doi:10.3390/e21060609
- 495 Gerber, A. J., Posner, J., Gorman, D., Colibazzi, T., Yu, S., Wang, Z., et al. (2008). An affective circumplex  
496 model of neural systems subserving valence, arousal, and cognitive overlay during the appraisal of  
497 emotional faces. *Neuropsychologia* 46, 2129–2139. doi:10.1016/j.neuropsychologia.2008.02.032
- 498 Ghassemi, M. M. (2018). *Life after death: techniques for the prognostication of coma outcomes after*  
499 *cardiac arrest*. Ph.D. thesis, Massachusetts Institute of Technology
- 500 Haselsteiner, E. and Pfurtscheller, G. (2000). Using time-dependent neural networks for EEG classification.  
501 *IEEE Transactions on Rehabilitation Engineering* 8, 457–463. doi:10.1109/86.895948
- 502 Hegger, R. and Kantz, H. (1999). Improved false nearest neighbor method to detect determinism in time  
503 series data. *Physical Review E* 60, 4970
- 504 Hirsch, L., LaRoche, S., Gaspard, N., Gerard, E., Svoronos, A., Herman, S., et al. (2013). American  
505 clinical neurophysiology society’s standardized critical care eeg terminology: 2012 version. *Journal of*  
506 *clinical neurophysiology* 30, 1–27
- 507 Hjorth, B. (1970). Eeg analysis based on time domain properties. *Electroencephalography and clinical*  
508 *neurophysiology* 29, 306–310
- 509 Jadhav, N., Manthalkar, R., and Joshi, Y. (2017). Electroencephalography-based emotion recognition using  
510 gray-level co-occurrence matrix features. *Advances in Intelligent Systems and Computing* 459 AISC,  
511 335–343. doi:10.1007/978-981-10-2104-6\_30
- 512 Jas, M., Engemann, D. A., Bekhti, Y., Raimondo, F., and Gramfort, A. (2017). Autoreject: Automated  
513 artifact rejection for MEG and EEG data. *NeuroImage* 159, 417–429. doi:10.1016/j.neuroimage.2017.  
514 06.030
- 515 Jeevan, R. K., Venu Madhava Rao, S. P., Pothunoori, S. K., and Srivikas, M. (2019). EEG-based emotion  
516 recognition using LSTM-RNN machine learning algorithm. *Proceedings of 1st International Conference*  
517 *on Innovations in Information and Communication Technology, ICICT 2019* , 1–4doi:10.1109/ICICT1.  
518 2019.8741506
- 519 Jia, X., Koenig, M. A., Nickl, R., Zhen, G., Thakor, N. V., and Geocadin, R. G. (2008). Early  
520 electrophysiologic markers predict functional outcome associated with temperature manipulation after  
521 cardiac arrest in rats. *Critical care medicine* 36, 1909
- 522 Jia, X. and Kohn, A. (2011). Gamma rhythms in the brain. *PLoS Biology* 9, 2–5. doi:10.1371/journal.pbio.  
523 1001045

- 524 Jie, X., Rui, C., and Li, L. (2014). Emotion recognition based on the sample entropy of EEG 24, 1185–1192.  
525 doi:10.3233/BME-130919
- 526 Jin, L. and Kim, E. Y. (2020). Interpretable cross-subject eeg-based emotion recognition using channel-wise  
527 features. *Sensors (Switzerland)* 20, 1–18. doi:10.3390/s20236719
- 528 Kamiński, J., Brzezicka, A., Gola, M., and Wróbel, A. (2012). Beta band oscillations engagement in human  
529 alertness process. *International Journal of Psychophysiology* 85, 125–128. doi:10.1016/j.ijpsycho.2011.  
530 11.006
- 531 Kanungo, L., Garg, N., Bhohe, A., Rajguru, S., and Baths, V. (2021). Wheelchair automation by a hybrid  
532 bci system using ssvep and eye blinks. In *2021 IEEE International Conference on Systems, Man, and*  
533 *Cybernetics (SMC)* (IEEE), 411–416
- 534 Karlekar, S., Niu, T., and Bansal, M. (2018). Detecting linguistic characteristics of alzheimer’s dementia  
535 by interpreting neural models. *arXiv* , 701–707
- 536 Katsigiannis, S. and Ramzan, N. (2018). DREAMER: A Database for Emotion Recognition Through  
537 EEG and ECG Signals from Wireless Low-cost Off-the-Shelf Devices. *IEEE Journal of Biomedical and*  
538 *Health Informatics* 22, 98–107. doi:10.1109/JBHI.2017.2688239
- 539 Kennel, M. B., Brown, R., and Abarbanel, H. D. (1992). Determining embedding dimension for phase-space  
540 reconstruction using a geometrical construction. *Physical review A* 45, 3403
- 541 Khateeb, M., Anwar, S., and Alnowami, M. (2021). Multi-domain feature fusion for emotion classification  
542 using deap dataset. *IEEE Access* 9, 12134–12142. doi:10.1109/ACCESS.2021.3051281
- 543 Klimesch, W. (1996). Memory processes, brain oscillations and EEG synchronization. *International*  
544 *Journal of Psychophysiology* 24, 61–100. doi:10.1016/S0167-8760(96)00057-8
- 545 Klimesch, W. (1999). EEG alpha and theta oscillations reflect cognitive and memory performance: a  
546 rKlimesch, W. (1999). EEG alpha and theta oscillations reflect cognitive and memory performance: a  
547 review and analysis. *Brain Research Reviews*, 29(2-3), 169–195. doi:10.1016/S016. *Brain Research*  
548 *Reviews* 29, 169–195. doi:10.1016/S0165-0173(98)00056-3
- 549 Klimesch, W. (2012). Alpha-band oscillations, attention, and controlled access to stored information.  
550 *Trends in Cognitive Sciences* 16, 606–617. doi:10.1016/j.tics.2012.10.007
- 551 Klimesch, W., Pfurtscheller, G., Mohl, W., and Schimke, H. (1990). Event-related desynchronization, ERD-  
552 mapping and hemispheric differences for words and numbers. *International Journal of Psychophysiology*  
553 8, 297–308. doi:10.1016/0167-8760(90)90020-E
- 554 Ko, L. W., Su, C. H., Yang, M. H., Liu, S. Y., and Su, T. P. (2021). A pilot study on essential oil  
555 aroma stimulation for enhancing slow-wave EEG in sleeping brain. *Scientific Reports* 11, 1–11.  
556 doi:10.1038/s41598-020-80171-x
- 557 Koelstra, S., Mühl, C., Soleymani, M., Lee, J. S., Yazdani, A., Ebrahimi, T., et al. (2012). DEAP: A  
558 database for emotion analysis; Using physiological signals. *IEEE Transactions on Affective Computing*  
559 3, 18–31. doi:10.1109/T-AFFC.2011.15
- 560 Kurdi, B., Lozano, S., and Banaji, M. R. (2016). Introducing the open affective standardized image set  
561 (OASIS). *Behavior Research Methods* 49, 457–470. doi:10.3758/s13428-016-0715-3
- 562 Lane, R. D., Chua, P. M., and Dolan, R. J. (1999). Common effects of emotional valence, arousal and  
563 attention on neural activation during visual processing of pictures. *Neuropsychologia* 37, 989–997.  
564 doi:10.1016/S0028-3932(99)00017-2
- 565 Lang, P. (1995). International affective picture system (iaps) : Technical manual and affective ratings
- 566 Lehmann, D. (1990). Brain Electric Microstates and Cognition : The Atoms of Thought

- 567 Leite, J., Carvalho, S., Galdo-Alvarez, S., Alves, J., Sampaio, A., and Gonçalves, Ó. F. (2012). Affective  
568 picture modulation: Valence, arousal, attention allocation and motivational significance. *International*  
569 *Journal of Psychophysiology* 83, 375–381. doi:10.1016/j.ijpsycho.2011.12.005
- 570 M, M., Ramachandran, N., and Sazali, Y. (2010). Classification of human emotion from eeg using discrete  
571 wavelet transform. *J. Biomedical Science and Engineering* 334054, 390–396. doi:10.4236/jbise.2010.  
572 34054
- 573 Mahajan, P. and Baths, V. (2021). Acoustic and Language Based Deep Learning Approaches for  
574 Alzheimer's Dementia Detection From Spontaneous Speech. *Frontiers in Aging Neuroscience* 13,  
575 1–11. doi:10.3389/fnagi.2021.623607
- 576 Malini, A. and Vimala, V. (2016). An epileptic seizure classifier using eeg signal. In *2016 International*  
577 *Conference on Computing Technologies and Intelligent Data Engineering (ICCTIDE'16)* (IEEE), 1–4
- 578 Milz, P., Faber, P. L., Lehmann, D., Koenig, T., Kochi, K., and Pascual-marqui, R. D. (2016).  
579 NeuroImage The functional significance of EEG microstates — Associations with modalities of  
580 thinking. *NeuroImage* 125, 643–656. doi:10.1016/j.neuroimage.2015.08.023
- 581 Misselhorn, J., Friese, U., and Engel, A. K. (2019). Frontal and parietal alpha oscillations reflect attentional  
582 modulation of cross-modal matching. *Scientific Reports* 9, 1–11. doi:10.1038/s41598-019-41636-w
- 583 Mohammad, S. M. (2018). Obtaining reliable human ratings of valence, arousal, and dominance for 20,000  
584 English words. *ACL 2018 - 56th Annual Meeting of the Association for Computational Linguistics,*  
585 *Proceedings of the Conference (Long Papers)* 1, 174–184. doi:10.18653/v1/p18-1017
- 586 Moors, A., De Houwer, J., Hermans, D., Wanmaker, S., van Schie, K., Van Harmelen, A. L., et al. (2013).  
587 Norms of valence, arousal, dominance, and age of acquisition for 4,300 Dutch words. *Behavior Research*  
588 *Methods* 45, 169–177. doi:10.3758/s13428-012-0243-8
- 589 Moss, M., Cook, J., Wesnes, K., and Duckett, P. (2003). Aromas of rosemary and lavender essential oils  
590 differentially affect cognition and mood in healthy adults. *International Journal of Neuroscience* 113,  
591 15–38. doi:10.1080/00207450390161903
- 592 Onikura, K., Katayama, Y., and Iramina, K. (2015). Evaluation of a method of removing head movement  
593 artifact from EEG by independent component analysis and filtering. *Advanced Biomedical Engineering*  
594 4, 67–72. doi:10.14326/abe.4.67
- 595 Panat, A., Patil, A., and Deshmukh, G. (2014). Feature extraction of eeg signals in different emotional  
596 states. In *IRAJ conference*
- 597 Panda, R., Khobragade, P. S., Jambhule, P. D., Jengthe, S. N., Pal, P., and Gandhi, T. K. (2010).  
598 Classification of eeg signal using wavelet transform and support vector machine for epileptic  
599 seizure detection. In *2010 International Conference on Systems in Medicine and Biology*. 405–408.  
600 doi:10.1109/ICSMB.2010.5735413
- 601 Patil, M., Garg, N., Kanungo, L., and Baths, V. (2019). Study of motor imagery for multiclass brain system  
602 interface with a special focus in the same limb movement. In *2019 IEEE 18th International Conference*  
603 *on Cognitive Informatics & Cognitive Computing (ICCI\* CC)* (IEEE), 90–96
- 604 Pedregosa, F., Varoquaux, G., Gramfort, A., Michel, V., Thirion, B., Grisel, O., et al. (2011). Scikit-learn:  
605 Machine learning in Python. *Journal of Machine Learning Research* 12, 2825–2830
- 606 Peirce, J., Gray, J., Simpson, S., MacAskill, M., Höchenberger, R., Sogo, H., et al. (2019). Psychopy2:  
607 Experiments in behavior made easy. *Behavior Research Methods* 51, 195 – 203
- 608 Phung, D. Q., Tran, D., Ma, W., Nguyen, P., and Pham, T. (2014). Using shannon entropy as eeg signal  
609 feature for fast person identification. In *ESANN*. vol. 4, 413–418
- 610 Russell, J. A. (1980). A circumplex model of affect. *Journal of Personality and Social Psychology* 39,  
611 1161–1178. doi:10.1037/h0077714



- 612 Saba-Sadiya, S., Chantland, E., Alhanai, T., Liu, T., and Ghassemi, M. M. (2020). Unsupervised eeg  
613 artifact detection and correction. *Frontiers in Digital Health* 2, 57
- 614 Schirrmester, R. T., Springenberg, J. T., Fiederer, L. D. J., Glasstetter, M., Eggensperger, K., Tangermann,  
615 M., et al. (2017). Deep learning with convolutional neural networks for EEG decoding and visualization.  
616 *Human Brain Mapping* 38, 5391–5420. doi:10.1002/hbm.23730
- 617 Schwilden, H. (1989). Use of the median eeg frequency and pharmacokinetics in determining depth of  
618 anaesthesia. *Baillière's clinical anaesthesiology* 3, 603–621
- 619 Shannon, C. E. (1948). A mathematical theory of communication. *The Bell System Technical Journal* 27,  
620 379–423. doi:10.1002/j.1538-7305.1948.tb01338.x
- 621 Shen, J., Zhang, X., Huang, X., Wu, M., Gao, J., Lu, D., et al. (2020a). An optimal channel selection for  
622 eeg-based depression detection via kernel-target alignment. *IEEE Journal of Biomedical and Health*  
623 *Informatics* 25, 2545–2556
- 624 Shen, X., Hu, X., Liu, S., Song, S., and Zhang, D. (2020b). Exploring EEG microstates for affective  
625 computing: Decoding valence and arousal experiences during video watching. *Proceedings of the Annual*  
626 *International Conference of the IEEE Engineering in Medicine and Biology Society, EMBS 2020-July*,  
627 841–846. doi:10.1109/EMBC44109.2020.9175482
- 628 Shestyuk, A. Y., Kasinathan, K., Karapoondinott, V., Knight, R. T., and Gurumoorthy, R. (2019). Individual  
629 EEG measures of attention, memory, and motivation predict population level TV viewership and Twitter  
630 engagement. *PLoS ONE* 14, 1–27. doi:10.1371/journal.pone.0214507
- 631 Shin, H.-C., Tong, S., Yamashita, S., Jia, X., Geocadin, G., and Thakor, V. (2006). Quantitative eeg  
632 and effect of hypothermia on brain recovery after cardiac arrest. *IEEE Transactions on Biomedical*  
633 *Engineering* 53, 1016–1023. doi:10.1109/TBME.2006.873394
- 634 Smith, M. E. and Gevins, A. (2004). Attention and brain activity while watching television: Components  
635 of viewer engagement. *Media Psychology* 6, 285–305. doi:10.1207/s1532785xmep0603\_3
- 636 Subasi, A., Tuncer, T., Dogan, S., Tanko, D., and Sakoglu, U. (2021). EEG-based emotion recognition  
637 using tunable Q wavelet transform and rotation forest ensemble classifier. *Biomedical Signal Processing*  
638 *and Control* 68, 102648. doi:10.1016/j.bspc.2021.102648
- 639 Tao, W., Li, C., Song, R., Cheng, J., Liu, Y., Wan, F., et al. (2020). EEG-based Emotion Recognition via  
640 Channel-wise Attention and Self Attention. *IEEE Transactions on Affective Computing* 3045, 1–12.  
641 doi:10.1109/TAFFC.2020.3025777
- 642 Torres P, E. P., Torres, E. A., Hernández-Álvarez, M., and Yoo, S. G. (2020). EEG-based BCI emotion  
643 recognition: A survey. *Sensors (Switzerland)* 20, 1–36. doi:10.3390/s20185083
- 644 Tuncer, T., Dogan, S., and Subasi, A. (2021). A new fractal pattern feature generation function based  
645 emotion recognition method using EEG. *Chaos, Solitons and Fractals* 144, 110671. doi:10.1016/j.chaos.  
646 2021.110671
- 647 Türk, Ö., Şeker, M., Akpolat, V., and Özerdem, M. S. (2017). Classification of mental task eeg records  
648 using hjorth parameters. In *2017 25th Signal Processing and Communications Applications Conference*  
649 *(SIU)* (IEEE), 1–4
- 650 Übeyli, E. D. (2009). Analysis of EEG signals by implementing eigenvector methods/recurrent neural  
651 networks. *Digital Signal Processing: A Review Journal* 19, 134–143. doi:10.1016/j.dsp.2008.07.007
- 652 Valsaraj, A., Madala, I., Garg, N., Patil, M., and Baths, V. (2020). Motor imagery based multimodal  
653 biometric user authentication system using eeg. In *2020 International Conference on Cyberworlds (CW)*  
654 (IEEE), 272–279

- 655 Verma, G. K. and Tiwary, U. S. (2017). Affect representation and recognition in 3D continuous  
656 valence–arousal–dominance space. *Multimedia Tools and Applications* 76. doi:10.1007/  
657 s11042-015-3119-y
- 658 Virtanen, P., Gommers, R., Oliphant, T. E., Haberland, M., Reddy, T., Cournapeau, D., et al. (2020).  
659 SciPy 1.0: Fundamental Algorithms for Scientific Computing in Python. *Nature Methods* 17, 261–272.  
660 doi:10.1038/s41592-019-0686-2
- 661 Wang, X., Nie, D., and Lu, B.-L. (2011a). Eeg-based emotion recognition using frequency domain features  
662 and support vector machines. In *ICONIP*
- 663 Wang, X.-W., Nie, D., and Lu, B.-L. (2011b). Eeg-based emotion recognition using frequency domain  
664 features and support vector machines. In *International conference on neural information processing*  
665 (Springer), 734–743
- 666 Wang, X.-W., Nie, D., and Lu, B.-L. (2014). Emotional state classification from EEG data using machine  
667 learning approach. *Neurocomputing* 129, 94–106. doi:10.1016/j.neucom.2013.06.046
- 668 Warriner, A. B., Kuperman, V., and Brysbaert, M. (2013). Norms of valence, arousal, and dominance for  
669 13,915 English lemmas. *Behavior Research Methods* 45, 1191–1207. doi:10.3758/s13428-012-0314-x
- 670 Zheng, W.-L., Dong, B.-N., and Lu, B.-L. (2014). Multimodal emotion recognition using eeg and eye  
671 tracking data. In *2014 36th Annual International Conference of the IEEE Engineering in Medicine and*  
672 *Biology Society (IEEE)*, 5040–5043
- 673 Zheng, W.-L., Zhu, J.-Y., and Lu, B.-L. (2017). Identifying stable patterns over time for emotion recognition  
674 from eeg. *IEEE Transactions on Affective Computing* 10, 417–429
- 675 Zhou, M., Tian, C., Cao, R., Wang, B., Niu, Y., Hu, T., et al. (2018). Epileptic seizure detection based on  
676 EEG signals and CNN. *Frontiers in Neuroinformatics* 12, 1–14. doi:10.3389/fninf.2018.00095
